# Supplementary material
Source: publisher site journal article supplement (https://www.dovepress.com/article/333604)

**Supplementary Table 1** Lymphocyte subsets changed in case one

|  | Baseline (2018.3.30) | | During the first CIK treatment (2018.4-2018.8) | During the second CIK treatment (2019.2-2019.11) |
| --- | --- | --- | --- | --- |
| Lymphocyte count | 900 | 1102.5 (570-1680) | | 1150 (970-1350) |
| T lymphocytes (%) | 74 | 83.9 (74-99) | | 80.06 (62-99) |
| T lymphocytes count | 666 | 883.13 (473-1394) | | 777.225 (601-905) |
| CD4 lymphocytes (%) | 46 | 33.2 (9-45) | | 26.13 (11-38) |
| CD4 lymphocytes count | 414 | 417.38 (245-554) | | 384.88 (284-441) |
| CD8 lymphocytes (%) | 28 | 49.8 (33-90) | | 51.88 (14-80) |
| CD8 lymphocytes count | 252 | 448.88 (222-823) | | 326.75 (199-439) |
| CD4/CD8 ratio | 1.65 | 1.06 (0.71-1.31) | | 0.73 (0.14-1.46) |
| B lymphocyte (%) | 13 | 6.7 (0-10) | | 6.375 (0-16) |
| B lymphocyte count | 117 | 89.25 (57-133) | | 142.38 (78-176) |
| NK lymphocyte (%) | 13 | 7.6 (0-13) | | 11.69 (0-22) |
| NK lymphocytes count | 126 | 107.63 (23-160) | | 195.88 (105-294) |

NK, Natural killer.

**Supplementary Table 2** Lymphocyte subsets changed in case two

|  | Baseline (2018.9.4) | During CIK treatment (2018.10-2020.3) | After CIK, before PD-1 (2020.8.17) | During PD-1treatment (2020.8.18-) |
| --- | --- | --- | --- | --- |
| Lymphocyte count | 2150 | 2129.5 (800-3020) | 2109 | 1867.67 (1749-2001) |
| T lymphocytes (%) | 68 | 82.03 (60-98) | 75 | 75.33 (72-78) |
| T lymphocytes count | 1462 | 1540.9 (480-2160) | 1582 | 1402.33 (1327-1442) |
| CD4 lymphocytes (%) | 45 | 34 (9-55) | 50 | 49 (45-52) |
| CD4 lymphocytes count | 968 | 987.2 (248-1350) | 1003 | 926 (870-990) |
| CD8 lymphocytes (%) | 17 | 42.11 (16-81) | 17 | 22.67 (20-25) |
| CD8 lymphocytes count | 366 | 410.95 (184-660) | 345 | 435.67 (413-474) |
| B lymphocyte (%) | 7 | 3.1 (0-10) | 7 | 5.33 (5-6) |
| B lymphocyte count | 151 | 144.45 (80-240) | 149 | 100.33 (82-114) |
| NK lymphocyte (%) | 23 | 13 (1-29) | 18 | 17.67 (15-20) |
| NK lymphocytes count | 495 | 428.6 (137-755) | 407 | 325.33 (275-396) |
| CD4/CD8 ratio | 2.71 | 0.82 (0.12-2.69) | 2.91 | 2.13 (2.07-2.22) |

NK, Natural killer.

**Supplementary Figure 1.** Changes of liver lesions and tumor markers after 2 times of interventional therapy and regofinib treatment. **(A)** At baseline in October 2017, red arrows pointed to target lesions and red circles marked non-target lesions. **(B)** In March 2018, the patient developed a new lesion, indicating progressive disease (PD). **(C)** Bio-marker curve of AFP, CA199 and CEA.


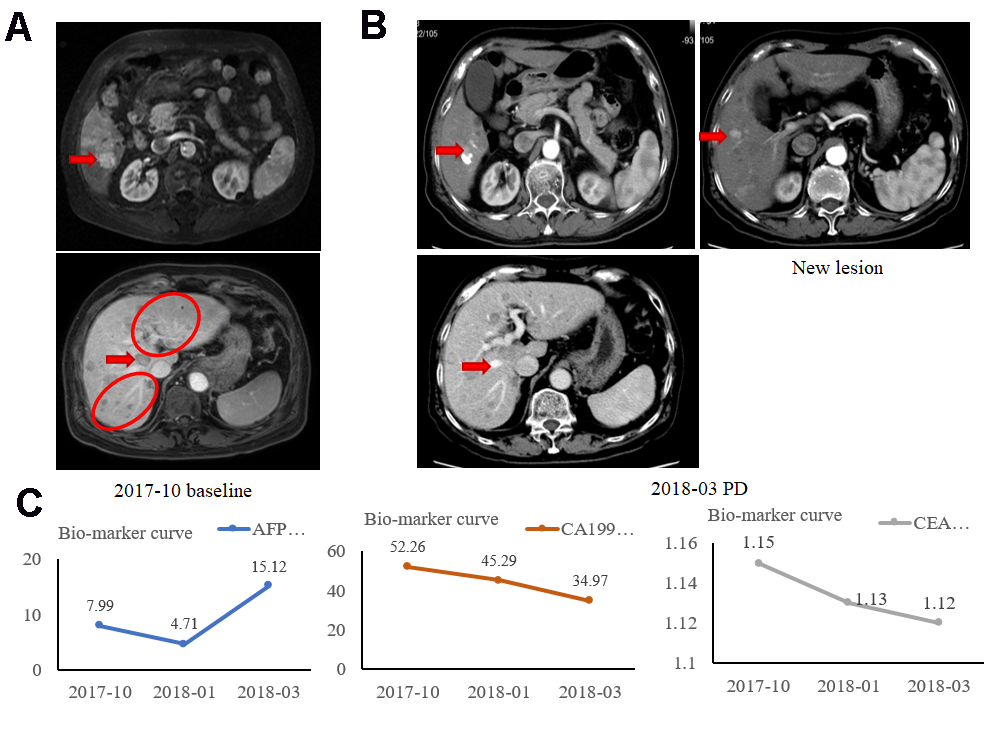


**Supplementary Figure 2.** Flowchart of bi-specific antibody conjugated CIK cell therapy.


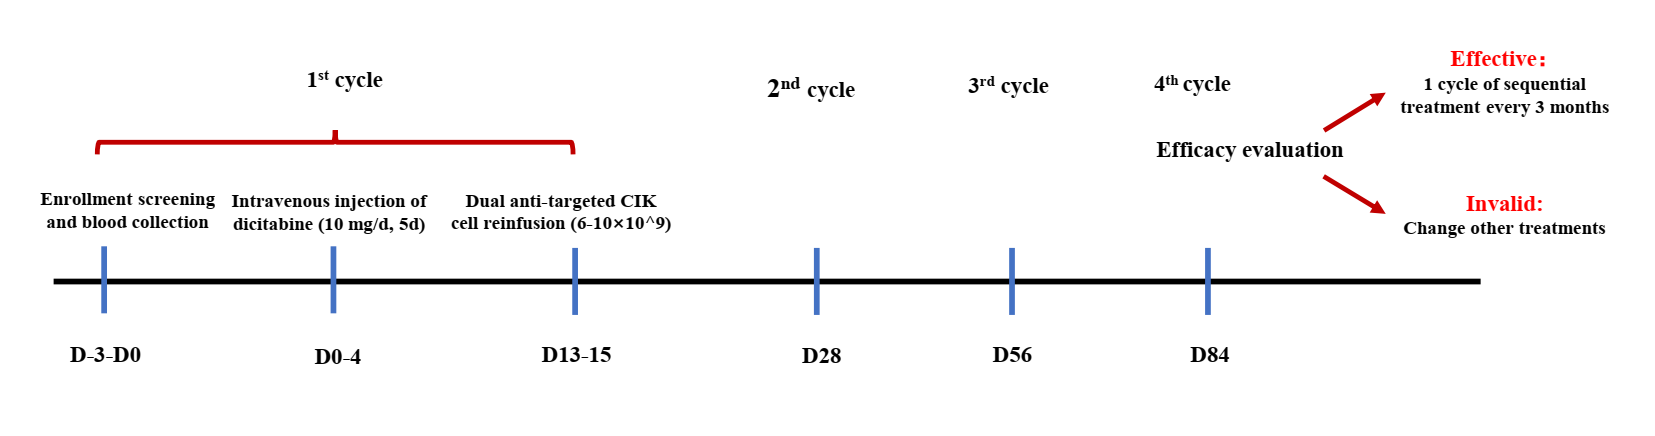


**Supplementary Figure 3.** Treatment efficacy and bio-marker curve of the patient from March 2018 to October 2018. **(A)** From March 2018 to August 2018, after targeted activated CIK cell therapy, the patient achieved PR; on October 2018, the lesions in S5 and S6 segments of liver were significantly larger than before, and the patient achieved PD. **(B)** Bio-marker curve of AFP, CA199 and CEA.


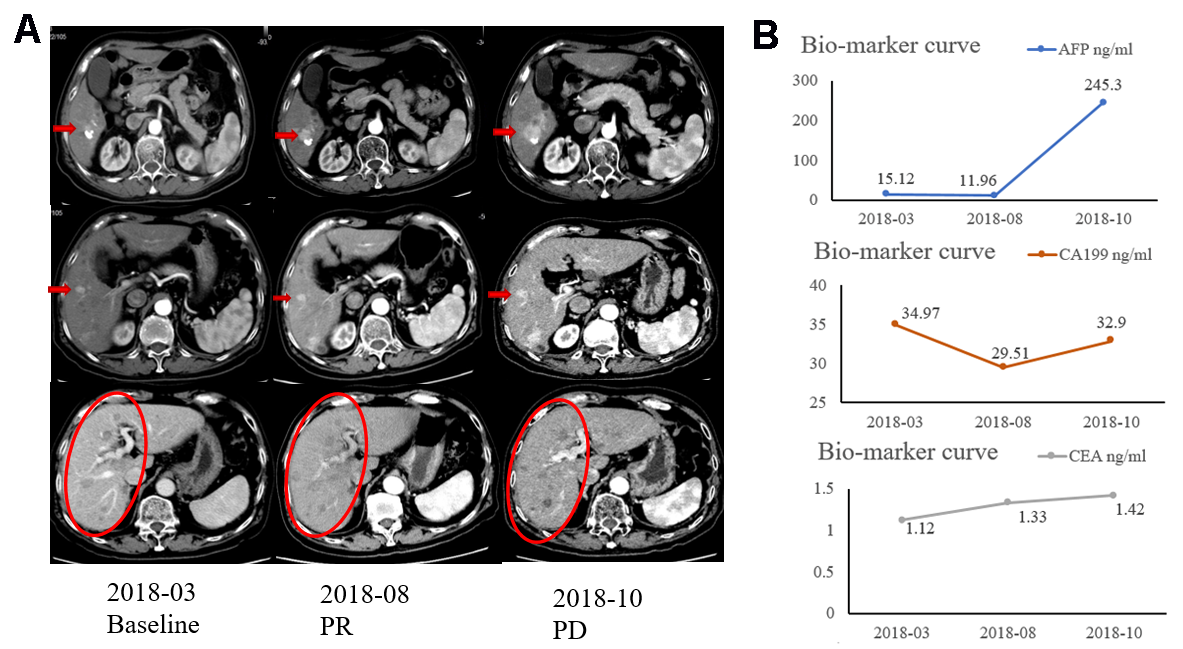


**Supplementary Figure 4. (A)** In October 2018, after microwave liver ablation, the target lesions were completely ablated. **(B)** In February 2019, the abdominal enhancement MRI showed the primary ICC nodules was disappeared.


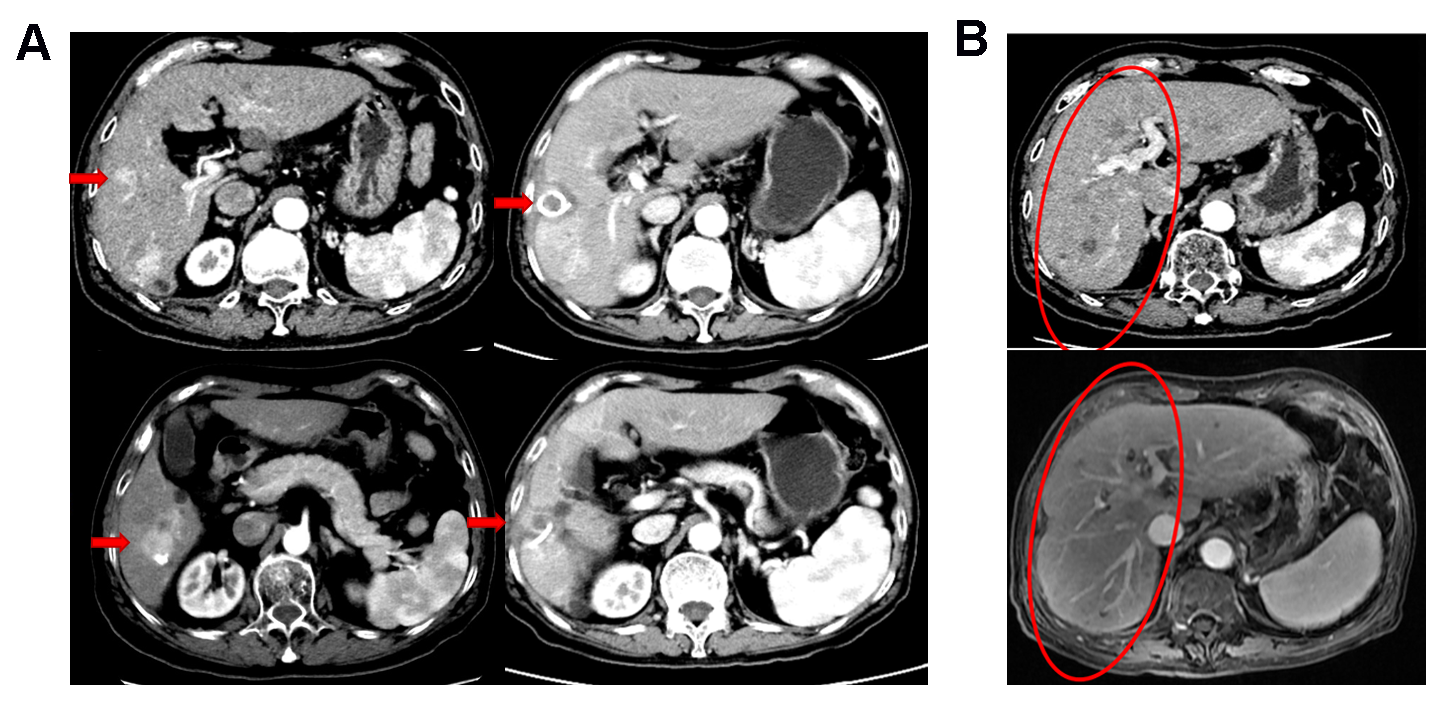


**Supplementary Figure 5.** Case one treatment summary.


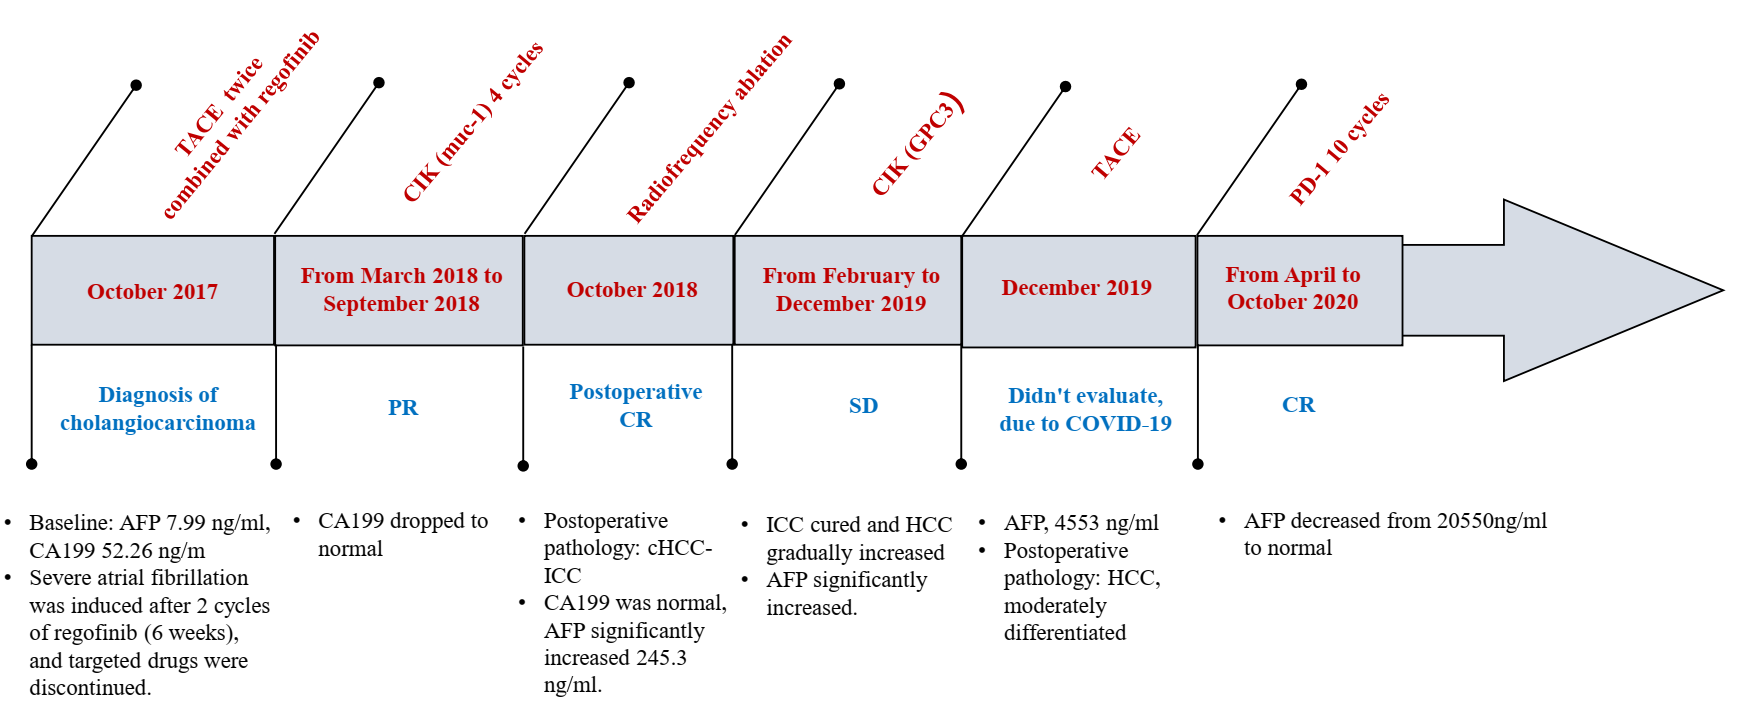

Supplement: Supplementary file 1 [file get_supplementary_file.php]
